# Supplementary material
Source: Copernicus journal article supplement (doi:10.5194/egusphere-2026-3246)
Supplement: Supplementary file 1 [file egusphere-2026-3246-supplement.pdf]

**Table S2:** Ring-width series from the ITRDB for parameterizing the growth process.

| Species                      | Timespan  | Series counts | Locations                  | Product name                                                                                                                                                                                                                                                                                                                                                                            | Reference                                                                                                                                             |
|------------------------------|-----------|---------------|----------------------------|-----------------------------------------------------------------------------------------------------------------------------------------------------------------------------------------------------------------------------------------------------------------------------------------------------------------------------------------------------------------------------------------|-------------------------------------------------------------------------------------------------------------------------------------------------------|
| <i>Abies densa</i>           | 1720–2006 | 48            | Bhutan                     | bt020                                                                                                                                                                                                                                                                                                                                                                                   | Cook et al., 2010                                                                                                                                     |
| <i>Abies forestii</i>        | 1348–2013 | 1176          | China                      | chin018; chin019; chin021; chin025; chin026; chin027; chin028; chin075                                                                                                                                                                                                                                                                                                                  | Cook et al., 2010; Li et al., 2017                                                                                                                    |
| <i>Abies recurvata</i>       | 1489–2005 | 183           | China                      | chin038; chin039                                                                                                                                                                                                                                                                                                                                                                        | Fan et al., 2013                                                                                                                                      |
| <i>Abies spectabilis</i>     | 1420–2013 | 1285          | Nepal                      | nepa001; nepa001e; nepa001i; nepa001n; nepa001x; nepa002; nepa002e; nepa002i; nepa002n; nepa002x; nepa003; nepa009; nepa011; nepa013; nepa014; nepa015; nepa017; nepa019; nepa020; nepa021; nepa022; nepa023; nepa026; nepa027; nepa028; nepa031; nepa032; nepa034; nepa035; nepa036; nepa038; nepa043; nepa046; nepa047; nepa048; nepa049; nepa050; nepa051; nepa052; nepa053; nepa055 | Schweingruber et al., n.d.; Krusic et al., n.d.; Gaire et al., 2011; Gaire et al., 2014; Kharal et al., 2014; Kharal et al., 2017; Gaire et al., 2017 |
| <i>Cupressus chengiana</i>   | 1575–2007 | 120           | China                      | chin016                                                                                                                                                                                                                                                                                                                                                                                 | Cook et al., 2010                                                                                                                                     |
| <i>Juniperus przewalskii</i> | -994–2643 | 2069          | China; Qinghai             | chin005; chin006; chin050; chin051; chin052; chin053; chin054; chin055; chin060; chin061; chin062; chin063; chin064; chin067; chin068; chin069; chin070; chin071                                                                                                                                                                                                                        | Sheppard et al., n.d.; Shao et al., 2013; Yang et al., 2014                                                                                           |
| <i>Juniperus recurva</i>     | 1417–2006 | 103           | Bhutan; Nepal              | bt018; bt019; nepa010; nepa018                                                                                                                                                                                                                                                                                                                                                          | Cook et al., 2010; Krusic et al., n.d.                                                                                                                |
| <i>Juniperus tibetica</i>    | 128–2010  | 1539          | China                      | chin017; chin020; chin024; chin043; chin044; chin045; chin046; chin048; chin059; chin065; chin066; chin074                                                                                                                                                                                                                                                                              | Cook et al., 2010; Brauning et al., 2013; Shao et al., 2013; Wang et al., 2014                                                                        |
| <i>Larix gmelinii</i>        | 1570–2020 | 183           | Mongolia                   | mong007e; mong007i; mong007l; mong007n; mong007t; mong007w; mong007x                                                                                                                                                                                                                                                                                                                    | Schweingruber et al., n.d.                                                                                                                            |
| <i>Larix griffithiana</i>    | 1620–2006 | 46            | Bhutan                     | bt016; bt017                                                                                                                                                                                                                                                                                                                                                                            | Cook et al., 2010                                                                                                                                     |
| <i>Picea likiangensis</i>    | 1406–2007 | 648           | China                      | chin022; chin023; chin037; chin042; chin047; chin049                                                                                                                                                                                                                                                                                                                                    | Cook et al., 2010; Fan et al., 2013; Brauning et al., 2013                                                                                            |
| <i>Picea schrenkiana</i>     | 1605–2004 | 521           | China                      | chin007; chin008; chin009; chin010; chin011; chin012; chin013; chin014; chin015; chin033; chin034                                                                                                                                                                                                                                                                                       | Cook et al., 2010                                                                                                                                     |
| <i>Picea spinulosa</i>       | 1280–2013 | 508           | Bhutan                     | bt006; bt007; bt008; bt009; bt010; bt011; bt021                                                                                                                                                                                                                                                                                                                                         | Cook et al., 2010; Krusic et al., 2015                                                                                                                |
| <i>Pinus armandii</i>        | 1359–2005 | 361           | China                      | chin004; chin004e; chin004i; chin004n; chin004x; chin056; chin057; chin058                                                                                                                                                                                                                                                                                                              | Wu et al., n.d.; Shao et al., 2013                                                                                                                    |
| <i>Pinus roxburghii</i>      | 1650–2015 | 480           | Bhutan; Nepal; Uttaranchal | bt014; bt015; indi011; indi020; nepa007; nepa033; nepa040; nepa057; nepa060                                                                                                                                                                                                                                                                                                             | Cook et al., 2010; Borgaonkar et al., n.d.; Krusic et al., n.d.; Zuber et al., n.d.; Thapa et al., 2019                                               |
| <i>Pinus sylvestris</i>      | 1626–2008 | 177           | Mongolia                   | mong005; mong034; mong035; mong036; mong037; mong038                                                                                                                                                                                                                                                                                                                                    | Jacoby et al., n.d.; Pederson et al., 2013                                                                                                            |
| <i>Pinus tabulaeformis</i>   | 1774–2007 | 57            | China                      | chin072                                                                                                                                                                                                                                                                                                                                                                                 | Shi et al., 2012                                                                                                                                      |
| <i>Pinus wallichiana</i>     | 1625–2016 | 345           | Bhutan; Nepal              | bt012; bt013; nepa005; nepa008; nepa056; nepa058; nepa059; nepa061                                                                                                                                                                                                                                                                                                                      | Cook et al., 2010; Krusic et al., n.d.; Thapa et al., 2019                                                                                            |
| <i>Pinus yunnanensis</i>     | 1942–2017 | 76            | China                      | chin076; chin077; chin078; chin079; chin080                                                                                                                                                                                                                                                                                                                                             | Sun et al., n.d.                                                                                                                                      |
| <i>Taxus baccata</i>         | 1630–2003 | 90            | Bhutan                     | bt022                                                                                                                                                                                                                                                                                                                                                                                   | Cook et al., 2008                                                                                                                                     |
| <i>Tsuga dumosa</i>          | 856–2016  | 943           | Bhutan; China; Nepal       | bt001; bt002; bt003; bt004; bt005; chin038; chin039; chin040; chin041; chin087; nepa004; nepa012; nepa016; nepa029; nepa030; nepa039; nepa041; nepa042                                                                                                                                                                                                                                  | Cook et al., 2010; Fan et al., 2013; Jiang et al., 2017; Krusic et al., n.d.                                                                          |
